# Supplementary material
Source: publisher figshare collection journal article supplement (https://acs.figshare.com/ndownloader/files/5738337)
Supplement: Supplementary file 1 [file 5738337]

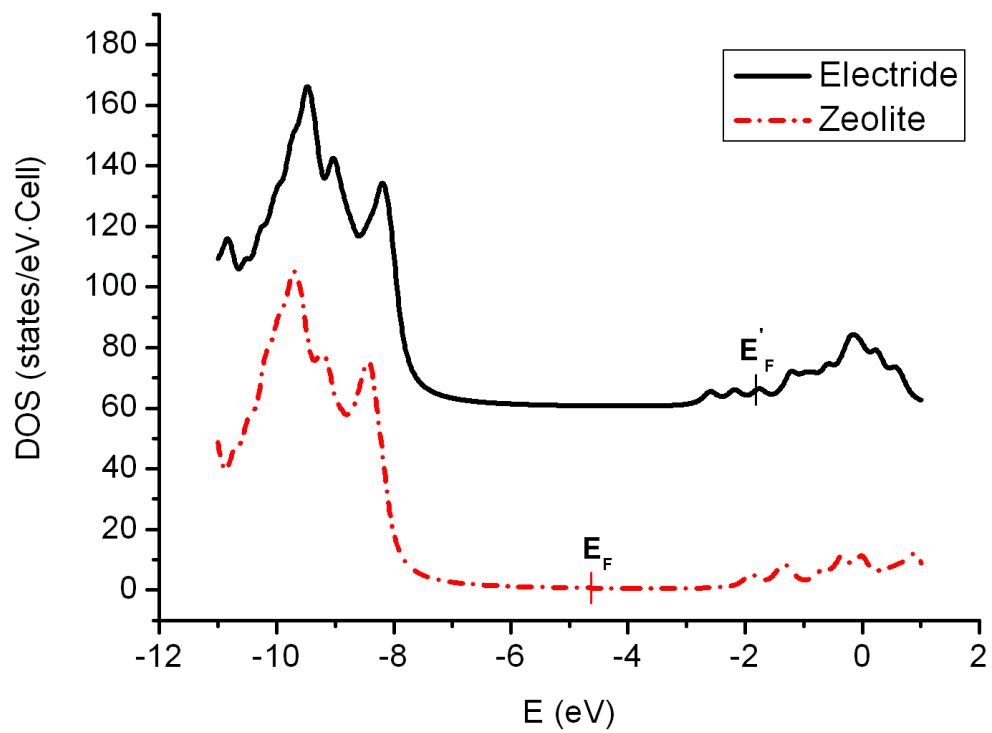

DOS of the inorganic electride and zeolite ITQ-4. The DOS are obtained by the  $\Gamma$ -only band structure calculations with a supercell (1x1x2). The Fermi levels are marked by short lines.
